# Supplementary material for: Leaf Anatomy, Morphology and Photosynthesis of Three Tundra Shrubs after 7-Year Experimental Warming on Changbai Mountain
Source: MDPI journal article supplement (doi:10.3390/plants8080271), 2019-08-07
Supplement: s1 [file s1]

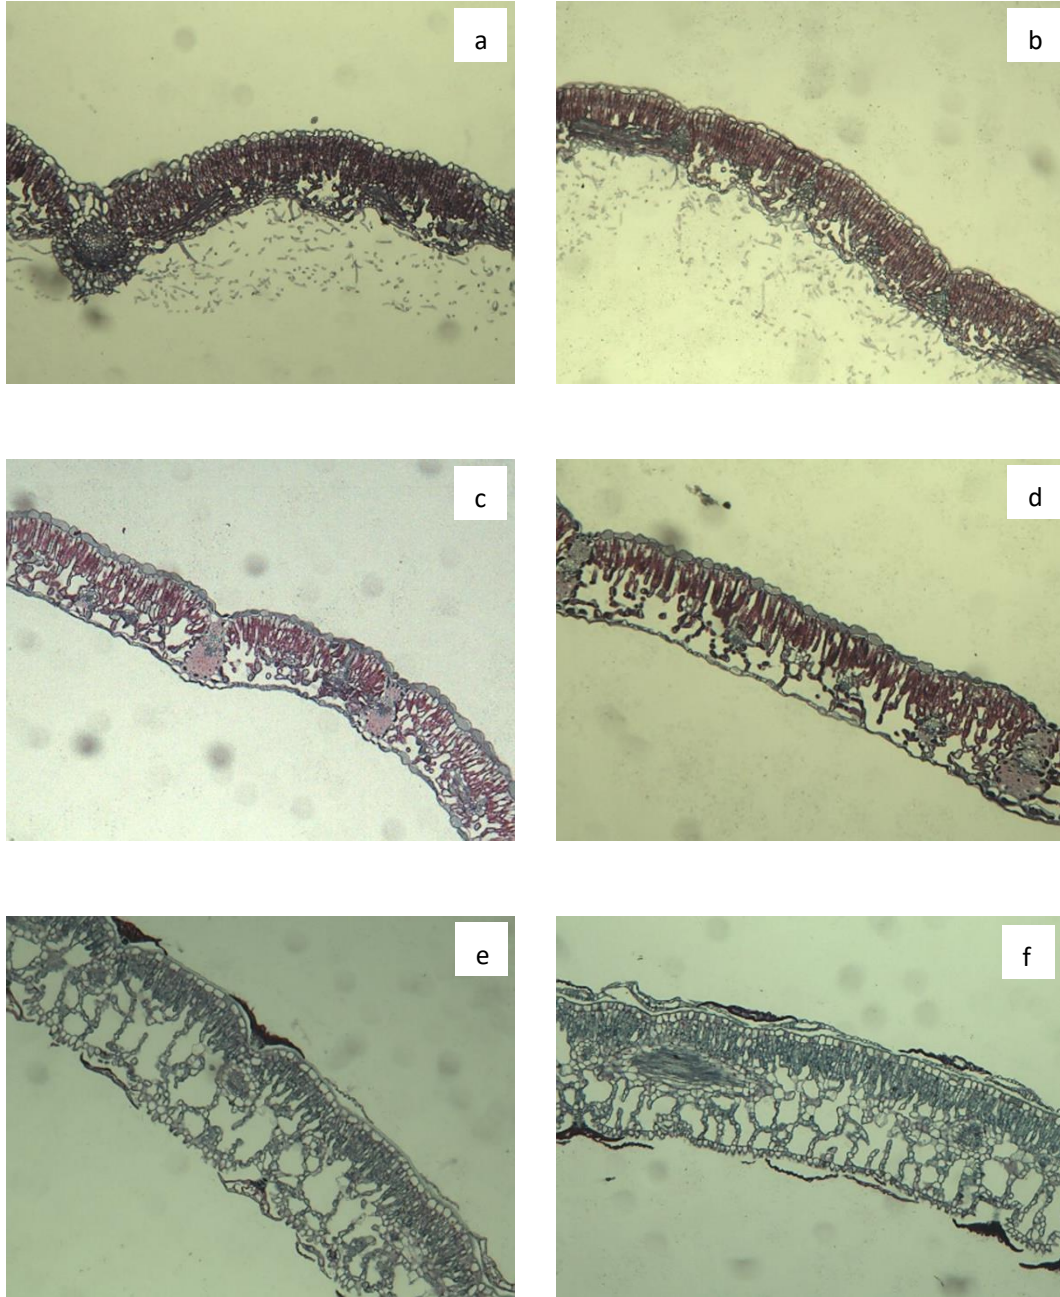

Figure S. Light microscopy images of leaf cross-sections for *Dryas octopetala* var. *asiatica* in the warming OTCs (a) and in the ambient control (b), *Vaccinium uliginosum* in the warming OTCs (c) and in the control (d), *Rhododendron confertissimum* in the warming OTCs (e) and in the control (f), sampled in July 2017 (measured data in detail in Table 4).
